# Supplementary material for: Ileocolonic Healing after Small Ileocecal Resection in Mice: NOD2 Deficiency Impairs Anastomotic Healing by Local Mechanisms
Source: MDPI journal article supplement (doi:10.3390/jcm12103601), 2023-05-22

Supplemental Table S1

| Gen          | Name                                     | Assay-ID      |
|--------------|------------------------------------------|---------------|
| MMP 2        | Matrix metalloproteinase-2               | Mm00439498_m1 |
| MMP 9        | Matrix metalloproteinase-9               | Mm00442991_m1 |
| MMP 13       | Matrix metalloproteinase-13              | Mm00439491_m1 |
| Col1a1       | Collagen 1 alpha 1                       | Mm00801666_g1 |
| Col3a        | Collagen 3 alpha                         | Mm01254476_m1 |
| TNF $\alpha$ | Tumor necrosis factor alpha              | Mm00443258_m1 |
| TGF $\beta$  | Transforming growth factor beta          | Mm01178820_m1 |
| GAPDH        | Glyceraldehyde 3-phosphate dehydrogenase | Mm99999915_g1 |

Supplemental Figure S1

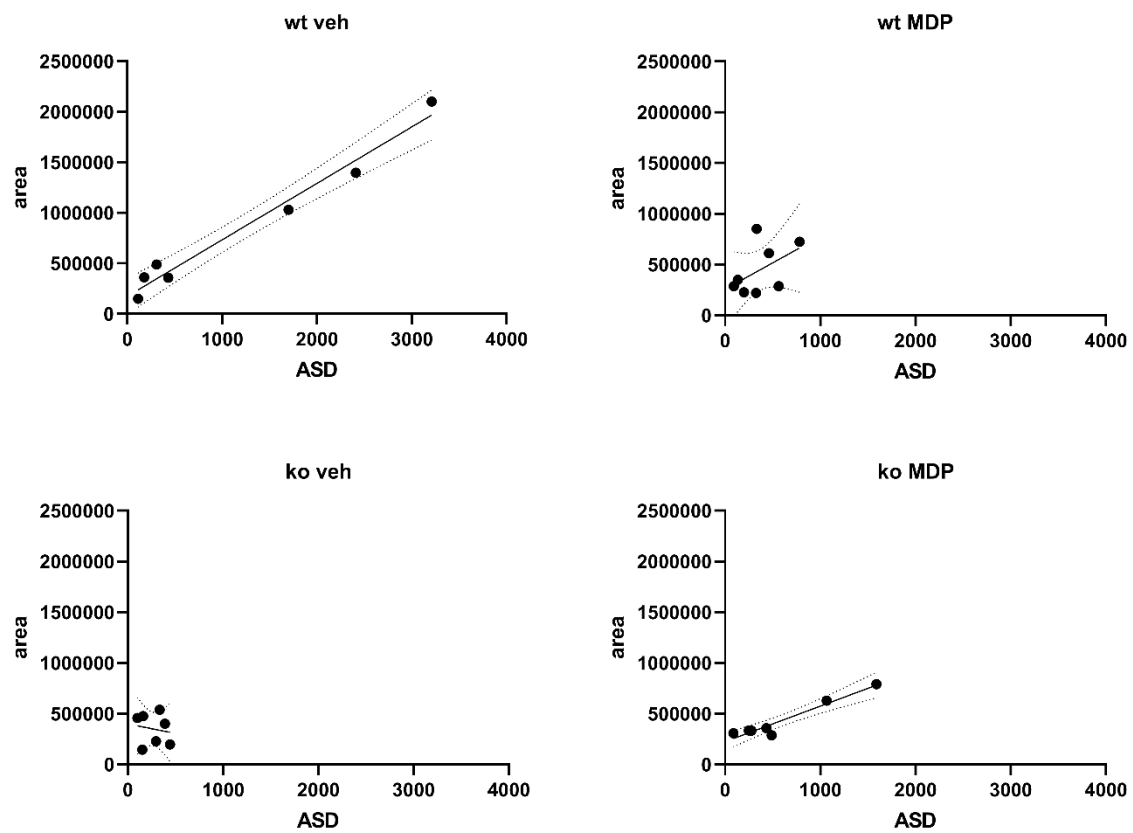

Supplement: s1 [file s1]
